# Supplementary material
Source: PubMed Central journal article supplement (PMC7963981)
Supplement: 2006_tables.pdf [file 2006_tables.pdf]

**On-line Table 1: Methodology of the source studies**

|                         | Prospective                                                  |                                                                            |                                                                        | Retrospective                                                                                      |                                                                                                                                         |                                                                        |
|-------------------------|--------------------------------------------------------------|----------------------------------------------------------------------------|------------------------------------------------------------------------|----------------------------------------------------------------------------------------------------|-----------------------------------------------------------------------------------------------------------------------------------------|------------------------------------------------------------------------|
|                         | Study A <sup>11</sup>                                        | Study B <sup>12</sup>                                                      | Study C <sup>13</sup>                                                  | Study D <sup>14</sup>                                                                              | Study E <sup>15</sup>                                                                                                                   | Study F <sup>16-20</sup>                                               |
| Inclusion criteria      | IV rtPA candidates with NIHSS score $\geq 10$ , no age limit | NIHSS score 4–23, arterial occlusion on diagnostic angiogram, no age limit | NIHSS score $\geq 8$ , non-IV candidate; age, 18–77 yr                 | Non-IV candidates; NIHSS score $\geq 16$ , onset $> 3$ hours or recent major surgery, no age limit | NIHSS score $\geq 4$ , arterial occlusion on angiogram, no age limit                                                                    | NIHSS score $\geq 4$ , no age limit                                    |
| Time window             | 0–3 hours                                                    | 3–6 hours                                                                  | 0–6 hours (anterior circulation), $< 24$ hours (posterior circulation) | 0–3 hours (if NIHSS score $\geq 16$ or if recent surgery), else $> 3$ hours                        | 0–3 hours (if NIHSS score $\geq 10$ ) $\pm$ IV rtPA, 3–6 hours (anterior circulation, NIHSS score $\geq 4$ ), 3–24 hours (BA occlusion) | 0–6 hours (anterior circulation), $< 12$ hours (posterior circulation) |
| IA pharmacologic agent  | None                                                         | Reteplase                                                                  | rtPA or reteplase                                                      | Reteplase                                                                                          | rtPA, urokinase or tenecteplase                                                                                                         | rtPA, prourokinase or tenecteplase                                     |
| IA mechanical procedure | Angioplasty for large vessels, snare for small vessels       | No                                                                         | Sonographic transmission                                               | Angioplasty and/or stenting for large vessels, snare for small vessels                             | Combination of angioplasty, stent, MERCI device, and snare                                                                              | Angioplasty and/or stenting for large vessels, snare for small vessels |
| Gp IIb/IIIa inhibition  | No                                                           | Abciximab                                                                  | No                                                                     | No                                                                                                 | Eptifibatid (7 cases)                                                                                                                   | No                                                                     |

**On-line Table 2: Results of the source studies**

|                                  | Study A <sup>11</sup>                                                           | Study B <sup>12</sup> | Study C <sup>13</sup>    | Study D <sup>14</sup>   | Study E <sup>15</sup>    | Study F <sup>16-20</sup>    |                           |
|----------------------------------|---------------------------------------------------------------------------------|-----------------------|--------------------------|-------------------------|--------------------------|-----------------------------|---------------------------|
| Sample size                      | 24                                                                              | 20                    | 16                       | 46                      | 41                       | 123                         |                           |
| Age (mean $\pm$ SD)              | 65 $\pm$ 18                                                                     | 65 $\pm$ 18           | 61 $\pm$ 12              | 70 $\pm$ 16             | 67 $\pm$ 17              | 65 $\pm$ 14                 |                           |
| Women                            | 13 (54%)                                                                        | 7 (35%)               | 8 (50%)                  | 19 (41%)                | 15 (37%)                 | 57 (47%)                    |                           |
| Initial NIHSS score <sup>a</sup> | 17 (11–21)                                                                      | 15 (6–23)             | 19.5 (9–40)              | 20.5 (5–43)             | 16 (5–42)                | 16 (4–30)                   |                           |
| Time to treatment (hr)           | Time to IA (mean $\pm$ SD): 4 $\pm$ 1.1; time to IV: 1.8 (0.6–2.9) <sup>a</sup> |                       | 5.2 (4–7.2) <sup>a</sup> | 4.6 (1–13) <sup>a</sup> | 4.4 (1–9.3) <sup>a</sup> | 4.6 (1.7–12.5) <sup>b</sup> | 4.9 (0.8–30) <sup>b</sup> |
| Early neurologic improvement     | 11 (65%)                                                                        | 13 (65%)              | 6 (38%)                  | 16 (35%)                | 18 (44%)                 | 55 (45%)                    |                           |
| Early neurologic deterioration   | 2 (8%)                                                                          | 1 (5%)                | 3 (19%)                  | 15 (32%)                | 5 (12%)                  | 19 (16%)                    |                           |
| Symptomatic ICH                  | 0                                                                               | 1 (5%)                | 2 (13%)                  | 4 (9%)                  | 4 (10%)                  | 8 (7%)                      |                           |
| Mortality                        | 2 (8%)                                                                          | 3 (15%)               | 6 (38%)                  | 24 (52%)                | 11 (30%), missing 4      | 29 (24%)                    |                           |
| mRS 0–2 at 1–3 months            | 6 (25%)                                                                         | 6 (30%)               | 6 (38%)                  | 17 (37%)                | 14 (34%)                 | 44 (39%), excluding 11      |                           |

<sup>a</sup> Median (range).<sup>b</sup> Mean (range).

**On-line Table 3: Compilation and patient selection for the current analysis**

|                         | Study A <sup>11</sup> | Study B <sup>12</sup> | Study C <sup>13</sup> | Study D <sup>14</sup> | Study E <sup>15</sup> | Study F <sup>16–20</sup> | Total    |
|-------------------------|-----------------------|-----------------------|-----------------------|-----------------------|-----------------------|--------------------------|----------|
| Initial compilation     | 24                    | 20                    | 16                    | 46                    | 41                    | 123                      | 270      |
| Excluded from analysis  | 5 <sup>a</sup>        | 0                     | 0                     | 0                     | 0                     | 11 <sup>b</sup>          | 16       |
| Included in analysis    | 19                    | 20                    | 16                    | 46                    | 41                    | 112                      | 254      |
| Complete recanalization | 9 (47%)               | 8 (40%)               | 5 (31%)               | 17 (37%)              | 15 (37%)              | 42 (38%)                 | 96 (38%) |
| Futile recanalization   | 5 (56%)               | 5 (63%)               | 5 (100%)              | 9 (53%)               | 10 (67%)              | 13 (31%)                 | 47 (49%) |

<sup>a</sup> No visualized arterial occlusion.

<sup>b</sup> No visualized arterial occlusion ( $n = 6$ ), lost to follow-up ( $n = 3$ ), age <18 ( $n = 1$ ), no documented time of symptom onset ( $n = 1$ ).

**On-line Table 4: Univariate analysis comparing patients with and without futile recanalization**

|                                                         | All <sup>a</sup> | Nonfutile Recanalization <sup>a</sup> | Futile Recanalization <sup>a</sup> | P Value |
|---------------------------------------------------------|------------------|---------------------------------------|------------------------------------|---------|
| Sample size                                             | 96 (100%)        | 49 (51%)                              | 47 (49%)                           |         |
| Age (mean ± SD); years                                  | 65 ± 15          | 58 ± 15                               | 73 ± 11                            | <.0001  |
| <40                                                     | 5 (5%)           | 5 (10%)                               | 0                                  |         |
| 40–49                                                   | 11 (11%)         | 10 (20%)                              | 1 (2%)                             |         |
| 50–69                                                   | 33 (34%)         | 18 (37%)                              | 15 (32%)                           |         |
| 70–79                                                   | 30 (31%)         | 14 (29%)                              | 16 (34%)                           |         |
| ≥80                                                     | 17 (18%)         | 2 (4%)                                | 15 (32%)                           |         |
| Women                                                   | 39 (41%)         | 19 (39%)                              | 20 (43%)                           | .84     |
| Study type                                              |                  |                                       |                                    | .061    |
| Prospective                                             | 39 (41%)         | 15 (31%)                              | 24 (51%)                           |         |
| Retrospective                                           | 57 (59%)         | 39 (69%)                              | 23 (49%)                           |         |
| Initial NIHSS score; median (range)                     | 16 (4–42)        | 14 (4–27)                             | 19 (7–42)                          | <.0001  |
| <10                                                     | 17 (18%)         | 14 (29%)                              | 3 (6%)                             |         |
| 10–19                                                   | 51 (53%)         | 30 (61%)                              | 21 (45%)                           |         |
| ≥20                                                     | 29 (30%)         | 5 (10%)                               | 24 (51%)                           |         |
| Vessel involved                                         |                  |                                       |                                    | .45     |
| ICA                                                     | 17 (18%)         | 7 (14%)                               | 10 (21%)                           | .43     |
| MCA                                                     | 61 (64%)         | 37 (76%)                              | 25 (53%)                           | .032    |
| BA                                                      | 11 (11%)         | 2 (4%)                                | 8 (17%)                            | .049    |
| VA                                                      | 6 (6%)           | 2 (4%)                                | 4 (9%)                             | .43     |
| PCA                                                     | 1 (1%)           | 1 (2%)                                | 0                                  |         |
| Circulation                                             |                  |                                       |                                    | .12     |
| Anterior                                                | 84 (88%)         | 46 (94%)                              | 39 (83%)                           |         |
| Posterior                                               | 12 (13%)         | 3 (6%)                                | 8 (17%)                            |         |
| Initial occlusion severity (Qureshi grade) <sup>b</sup> |                  |                                       |                                    | .65     |
| Mild (grade 0–2)                                        | 35 (37%)         | 18 (39%)                              | 17 (35%)                           |         |
| Severe (grade 3–5)                                      | 60 (63%)         | 28 (61%)                              | 32 (65%)                           |         |
| Time to treatment; median (range); minutes              | 256 (60–780)     | 240 (60–540)                          | 263 (60–780)                       | .38     |
| ≤3 hours                                                | 27 (28%)         | 15 (31%)                              | 12 (26%)                           |         |
| 3–6 hours                                               | 53 (55%)         | 26 (53%)                              | 27 (57%)                           |         |
| >6 hours                                                | 16 (17%)         | 8 (16%)                               | 8 (17%)                            |         |
| Symptomatic hemorrhagic complication                    | 5 (5%)           | 1 (2%)                                | 4 (9%)                             | .2      |

<sup>a</sup> Values represent frequency and rate except if otherwise stated.

<sup>b</sup> Six patients did not have a Qureshi grade available. TIMI score was used for 5 of these 6 patients. One patient had missing information for both Qureshi and TIMI grading.
